# Supplementary material
Source: PubMed Central journal article supplement (PMC2880010)
Supplement: supp_121_4_536__1.pdf [file supp_121_4_536__1.pdf]

## TM 1

Human .....MAANYSTSTRREHVVKVKTSSQPGLFRLSE TSGGMFVGLMAFLLSFYLITNEGRALKTATSAEGLSLVVS  
 Gallus .....MSRNFSDTGSKKEHVKITSEAKPGFLERLSE TSGGMLIGLGFLLSFYLLFTNEGRALRTAKSDDEGLSLVIP  
 Tetraodon .....MSSAQSSGKNPNKHTRVSAKANPGFLERLSE TAGGTLVGLGLFLLSFYVLLFTNEGRALQTSSSDDEGLSRVVS  
 Drosophila .....MASLSE TLRSHWPIALFVILFVAGGTELYWNEGRAVHMMATDEAHADYS  
 Mesorhizobium MEFVAALRPSSAAVPCGLLASFVSGETMSDSFREVTSVSWFGRIKRAVGGVIFGLLLVLMVIGLWNEGRAVQTARSAEGAGAVVA

Human PDSIHSVAPE.NEGRLVHITIGALRTSKLISDPNYGVHLPAVKRRHVEMYQWVE TESREYTEDG..QVKKETRYSYNTEWRS E I I N S K  
 Gallus LDNIHVSQO.NEGRLVHLAGALSTAKPLFDPSYGLSIQAVKPKRQVEMYQWVE YDSREYEENG..EIKKTKSYNTEWKP EVVNSR  
 Tetraodon LGSSSLDPO.NNNHLVHIFAPLKTQAQPLHDPNYKVVVQAVKPKRQVEMYQWVE HQESKDYQEEG..ETKTETTYNTEWKS ELINSR  
 Drosophila VRFTEEQEVGLEGRIVHLSGPILVGEP LTPEDNYIQLLAVKRRRQVEMYQWVE AVEHNYGDSVGTTHSDSPRTTYTREWDRDKIVDSR  
 Mesorhizobium IN.ADSVDAG.NDGRLVHVS GPVTDAGLSDEDFGIAAQLRISRSVEMYQWVE SKSETTKKLG.GEETETTYYSKVVWDDSDIDS

Human NDREIIGHKNP SAMAVE SFMATAPFVQIGRF LSSGLLDKVDNFKSLSLSKLEDPHVD.....IIRRGDFVHSENPKYPEVGDLR  
 Gallus NDREIIGHKNP SAMAVE SFTAVSPNVQVGSFVLSKGLVDKIDDFKQLSLAHLEDPHAD.....VTRGGDYFHSENPRRPEVGDLR  
 Tetraodon HDDEKEIGHONP SAMAVE VTVVAPEVRVGFVLSKGLVEQIDHFQTLSLRDFPVLDEFP.....LSIDDYFVHTEHPRRPEVGDVR  
 Drosophila NYNRRGHITNPSHPFIESHVQVADAVF IGRVLEGAEVKPKFNQYQELTSDIRPE...DSG.....VKLHLGIYVHTNDVFNPEVGDLR  
 Mesorhizobium DEKKPDGHONP.PMALHSRVFQIPQGLVAVDLDLPVLDRIDGDKAYSLSANQSATIKAAYTGTKP LSIIVDRGLVGN DNTT PALGDR

## TM (? ) 2

Human VSFYSYGLSGDDPDLPGAHVVTVIARQRCQDLVFPFS TKSQDTLLLLHHGDFSAEEVFHRELRSNSMKTWGLRAACWMAFMGLNLMTRI  
 Gallus VSFYFAGLSGHDPHLGSADKVTVIARQKCDLVPVYHTKSGDVLQILYFGDLSVEEVFQKEHESNTMKTWALRAACWLMFVGISLMTRI  
 Tetraodon VRFYSFAGLSGESSRFPPQPVSVVAMQRGEHLEPKTRSGGTLLEILYLGETAAEEVFAKEHQNSLKTWALRAACWALMFLSIQLSMRI  
 Drosophila LLFSFAGMEG.....EVFSVVGKLSGNKLVPIYITRSRVPVLLVYFGGLSVQEVFRLAARAAQVLLHWWVFWGLLLIFFGVTCNTMI  
 Mesorhizobium IGYELA.....PLGVSVIVARQASRFEPYQIQAGDA LLMVDITGNVPADKMSAEAVSANTLI TWLLRAGGLLLITIGFALFLSP

## TM 3

## TM 4

Human LYTLVDWFPVVRDLVNIIG..LKAFAFCVATSLTLLTVAAAGWLFYRPLWALLTAGLALVP...ILVARTRVPAKKLE.....  
 Gallus VYTLVDWFPVVRDLVNIIG..LKAFAFCVASLSLSTIAGWFFYRPLWALLIGL SVVP...IVVAKSRP PPKKH.....  
 Tetraodon IYTLVDWFPVLRLEVLNIG..LKVLLCLCSLSSLLTIAAGWLFYRPLVAAALAAALALVP...VFLTRSGLP PAKKE.....  
 Drosophila LRLLFVRVPLLVALAPDPQFPVIGNLLIAPSLALTIAAVAVILHRPVI GACULLAGASPY...VWFTRNLVDYHRLD.....  
 Mesorhizobium IGVILDVIPLFGSMARMG..TGLIAFFLALVGGTTTIAAWFWYRPLVLAAGLLAGVI AAAAVYV LGRSRKAAAPMATPSTGTAT
