# Supplementary material
Source: PubMed Central journal article supplement (PMC2880010)
Supplement: supp_121_4_536__6.pdf [file supp_121_4_536__6.pdf]

Table S1. Oligonucleotide pairs used for generation of the LUMA constructs and the miRNA construct.

|                                                    |                                                          |                                                                                                                                                                                                                                                           |
|----------------------------------------------------|----------------------------------------------------------|-----------------------------------------------------------------------------------------------------------------------------------------------------------------------------------------------------------------------------------------------------------|
| LUMA (1-200)                                       | forward<br>reverse                                       | 5'-ATTCCTCTAGAATGGCAGCGAACTATTCCAG<br>5'-ATTCCAAGCTTCAATCTTGTCAATGAGGCCTG                                                                                                                                                                                 |
| LUMA (1-309)                                       | forward<br>reverse                                       | 5'-ATTCCTCTAGAATGGCAGCGAACTATTCCAG<br>5'-ATTCCAAGCTTCCCATGTCTTCATGGAATTGC                                                                                                                                                                                 |
| LUMA (53-200)                                      | forward<br>reverse                                       | 5'-ATTCCTCTAGAATGAACGAGGGCCGAGCACTG<br>5'-ATTCCAAGCTTCAATCTTGTCAATGAGGCCTG                                                                                                                                                                                |
| LUMA (53-309)<br>(SP 53-309 precursor)             | forward<br>reverse                                       | 5'-ATTCCTCTAGAATGAACGAGGGCCGAGCACTG<br>5'-ATTCCAAGCTTCCCATGTCTTCATGGAATTGC                                                                                                                                                                                |
| LUMA (53-345)                                      | forward<br>reverse                                       | 5'-ATTCCTCTAGAATGAACGAGGGCCGAGCACTG<br>5'-ATTCCAAGCTTCGTTGACAAGGTCTCGGAAG                                                                                                                                                                                 |
| LUMAgal<br>(LUMA 1-165)                            | forward<br>reverse                                       | 5'-ATTCCTCTAGAATGGCAGCGAACTATTCCAG<br>5'-ATTCCCTGCAGGCCCTCGTTGGTGAAAATTAAG                                                                                                                                                                                |
| LUMAgal<br>(LUMA 306-400)                          | forward<br>reverse                                       | 5'-ATTCCCCTATGGATGAAGACATGGGGCCTGC<br>5'-ATTCCAAGCTTCCTCCAGCTTTTTGGCTGG                                                                                                                                                                                   |
| LUMAgal<br>( $\beta$ -D-galactosidase<br>domain 3) | forward<br>reverse                                       | 5'-ATTCCCTGCAGGAGGTGCGGATTGAAAATGG<br>5'-ATTCCCCTATGGCCCGGATAAACGGACCTGG                                                                                                                                                                                  |
| Signal peptide                                     | forward1<br><br>forward2<br><br>reverse1<br><br>reverse2 | 5'-CTAGCGCCACCATGGCTACTGGCTCCAGAACTTCTTT<br>GCTGCTTGCTTTC<br>5'-GGCTTGTTGTGTTTGCCTTGGTTGCAGGAAGGATCTG<br>CTTCCCAACTGCTAGCT<br>5'-CTAGAGCTAGCAGTTGGGAAAGCAGATCCTTCCTGC<br>AACCAAGGCAA<br>5'-ACACAACAAGCCGAAAGCAAGCAGCAAAGAAGTTCT<br>GGAGCCAGTAGCCATGGTGGCG |
| LUMA 53-309<br>(for antibody<br>production)        | forward<br>reverse                                       | 5'-ATTCCGGTACCATGAACGAGGGCCGAGCACTG<br>5'-ATTCCGAATTCCCCTTGACAAGGTCTCGGAAG                                                                                                                                                                                |
| hLUMA 1-400                                        | forward<br>reverse                                       | 5'-ATGGCCGCGAATTATTCCAGTACCAGTACC<br>5'-CCAGTCCACCAAGGTGTAGAGGATCCGTGT                                                                                                                                                                                    |
| Hmi48                                              | forward<br><br>reverse                                   | 5'-TGCTGATAAGGTTGAGGCCCATGAACGTTTTGGCCAC<br>TGACTGACGTTTCATGGCTCAACCTTAT<br>5'-CCTGATAAGGTTGAGCCATGAACGTCAGTCAGTGGC<br>CAAACGTTTCATGGGCCTCAACCTTATC                                                                                                       |
