# Supplementary material
Source: PubMed Central journal article supplement (PMC2880010)
Supplement: supp_121_11_1876__1.pdf [file supp_121_11_1876__1.pdf]

**Table S1.** Mapping positions, genomic properties and replication timing of all large-insert clones used as FISH probes in this study, either as pools as indicated in A-E, as subsets thereof or as individual probes. The large-insert clone ID refers to the abbreviation used throughout the text. The mapping position was derived from the NCBI 36 assembly ([www.ensembl.org](http://www.ensembl.org)). <sup>a)</sup> The replication timing was previously determined by array-CGH (Woodfine et al., 2004). Each clone was assigned to an isochores according to the previously published isochores map of the human genome (Costantini et al., 2006). Isochores <sup>b)</sup> are DNA segments with an internal variation in <sup>c)</sup> %GC content below the full variation of the GC content in the entire human genome, <sup>d)</sup> The local gene density was determined based on the available information on 'known genes' (NCBI 36 assembly; [www.ensembl.org](http://www.ensembl.org)) for a 2 Mb window, 1 Mb upstream and 1 Mb downstream of the center of each clone.

(A) Chromosome 1-22 and X large-insert clone pools representing early-replicating (green) and late-replicating (red) loci, each one clone per chromosome, if available

| Clone ID | 1 Mb array ID | Clone name  | Chr. | Position (bp)       | Clone length (bp) | Replication timing <sup>a)</sup> | Isochores position (Mbp) <sup>b)</sup> | % GC in isochores <sup>c)</sup> | Genes ± 1 Mbp <sup>d)</sup> |
|----------|---------------|-------------|------|---------------------|-------------------|----------------------------------|----------------------------------------|---------------------------------|-----------------------------|
| 1e       | dJ144C9       | RP1-144C9   | 1    | 27575323-27652644   | 77322             | 2.03                             | 24.9-28.3                              | 48.1                            | 65                          |
| 1l       | bA552K17      | RP11-552K17 | 1    | 194520170-194617850 | 97681             | 1.03                             | 194.5-194.9                            | 38.40                           | 11                          |
| 2-1e     | bA83M8        | RP11-83M8   | 2    | 10189946-10392995   | 203050            | 1.97                             | 10.1-11.2                              | 48.7                            | 34                          |
| 2-3l     | bA458O14      | RP11-458O14 | 2    | 79819775-79920395   | 100621            | 1.04                             | 78.9-80.9                              | 38.60                           | 13                          |
| 3e       | bA78O10       | RP11-78O10  | 3    | 49843917-49994333   | 150417            | 2.04                             | 49-50.1                                | 49.1                            | 74                          |
| 3l       | bA90M7        | RP11-90M7   | 3    | 164366661-164516629 | 149969            | 1.05                             | 162.8-169.2                            | 35.1                            | 1                           |
| 4e       | bA572O17      | RP11-572O17 | 4    | 1595351-1782573     | 187223            | 1.96                             | 0.5-4.3                                | 51.9                            | 52                          |
| 4l       | bA347K3       | RP11-347K3  | 4    | 189700508-189778943 | 78436             | 0.98                             | 189.6-190.7                            | 38.8                            | 11                          |
| 5-4l     | bA170P5       | RP11-170P5  | 5    | 165677723-165841050 | 163328            | 1.06                             | 165.6-166.7                            | 38.1                            | 4                           |
| 6e       | dJ34F7        | RP1-34F7    | 6    | 32031967-32200774   | 168808            | 1.99                             | 31.6-32.3                              | 51.9                            | 109                         |
| 6l       | bA21G12       | RP11-21G12  | 6    | 93190239-93225251   | 35013             | 1.09                             | 92.1-97.2                              | 35.1                            | 6                           |
| 7-3e     | bA450O3       | RP11-450O3  | 7    | 72073705-72269192   | 195488            | 1.94                             | 71.7-73.5                              | 49.9                            | 48                          |

|       |          |             |    |                     |        |      |             |       |     |
|-------|----------|-------------|----|---------------------|--------|------|-------------|-------|-----|
| 7l    | bA343J14 | bA343J14    | 7  | 78310705-78485567   | 174863 | 1.05 | 77.7-79.4   | 35.8  | 8   |
| 8e    | bA446E9  | RP11-446E9  | 8  | 57012703-57129759   | 117057 | 1.92 | 56.9-57.7   | 41.3  | 22  |
| 8l    | bA75P13  | RP11-75P13  | 8  | 34287721-34455078   | 167358 | 1.05 | 33.8-37.1   | 38.2  | 12  |
| 9e    | bA570D4  | RP11-570D4  | 9  | 113691272-113781581 | 90310  | 1.92 | 113.5-113.8 | 42.9  | 26  |
| 9l    | bA264J11 | RP11-264J11 | 9  | 28670842-28755649   | 84808  | 1.05 | 28.2-31.9   | 35.20 | 1   |
| 10e   | bA122K13 | RP11-122K13 | 10 | 134955982-135072292 | 116311 | 1.92 | 133.8-135.1 | 56.5  | 38  |
| 10l   | bA428N21 | RP11-428N21 | 10 | 68138624-68290770   | 152147 | 1.02 | 65.7-68.9   | 35.7  | 6   |
| 11e   | bA231P15 | RP11-231P15 | 11 | 62241256-62406841   | 165586 | 1.92 | 61.9-62.6   | 49.0  | 79  |
| 11l   | bA324K6  | RP11-324K6  | 11 | 37673711-37779927   | 106217 | 1.07 | 37-39.3     | 35.4  | 0   |
| 12e   | bA474N8  | RP11-474N8  | 12 | 55578149-55750146   | 171998 | 2.01 | 55.6-56.6   | 48.3  | 98  |
| 12l   | bA268A19 | RP11-268A19 | 12 | 80263369-80282240   | 18872  | 1.11 | 79.1-81.5   | 35.5  | 13  |
| 13l   | bA275J18 | RP11-275J18 | 13 | 88476233-88642741   | 166509 | 1.09 | 80.2-90.1   | 34.6  | 4   |
| 14e   | bA463C8  | RP11-463C8  | 14 | 76653300-76831630   | 178331 | 1.93 | 76.3-76.9   | 49.0  | 34  |
| 14l   | bA168D12 | RP11-168D12 | 14 | 41353854-41500293   | 146440 | 0.99 | 39.5-43.9   | 34.7  | 1   |
| 15e   | bA414J4  | RP11-414J4  | 15 | 72768830-72953361   | 184532 | 2.00 | 72.5-73.9   | 48.9  | 58  |
| 15l   | bA215J7  | RP11-215J7  | 15 | 52652476-52815253   | 162778 | 1.12 | 52.2-52.8   | 35.9  | 15  |
| 16e   | bA2C24   | RP11-2C24   | 16 | 30539890-30747839   | 207950 | 1.93 | 26.9-30.8   | 49    | 101 |
| 16l   | bA467L24 | RP11-467L24 | 16 | 62921648-63071733   | 150086 | 1.05 | 61.8-63.2   | 36.2  | 1   |
| 17-5e | bA141D15 | RP11-141D15 | 17 | 73636218-73813841   | 177624 | 2.11 | 73.6-74     | 54.0  | 47  |
| 18e   | bA61J14  | RP11-61J14  | 18 | 54567090-54747580   | 180491 | 2.03 | 52.8-55.8   | 43.1  | 21  |
| 18l   | bA25O3   | RP11-25O3   | 18 | 47958320-48119508   | 161189 | 1.05 | 47.1-48.6   | 38.70 | 6   |
| 19e   | bA521I20 | RP11-521I20 | 19 | 54525652-54718270   | 192619 | 2.15 | 53.3-55.2   | 52.3  | 114 |
| 20e   | bB152O15 | RP13-152O15 | 20 | 62108686-62284676   | 175991 | 2.38 | 59.6-62.5   | 55.0  | 54  |
| 21e   | bA113F1  | RP11-113F1  | 21 | 42507308-42689289   | 181982 | 1.98 | 41.4-43.5   | 49.0  | 36  |
| 21l   | bA509A1  | RP11-509A1  | 21 | 21128294-21149667   | 21374  | 1.09 | 18.4-25.6   | 35.10 | 5   |

|     |         |            |    |                     |        |      |             |      |    |
|-----|---------|------------|----|---------------------|--------|------|-------------|------|----|
| 22e | dJ76B20 | RP1-76B20  | 22 | 28379384-28551065   | 171682 | 1.95 | 27.7-29.9   | 48.0 | 83 |
| Xe  | bA54I20 | RP11-54I20 | X  | 152359266-152538562 | 179297 | 1.98 | 152.2-152.8 | 55.8 | 76 |
| Xl  | dA22P16 | RP6-22P16  | X  | 66474359-66577725   | 103367 | 1.07 | 66.3-66.5   | 36.7 | 6  |

## (B) Chromosome-2-specific large-insert clone pools representing early-replicating (green) and late-replicating (red) loci

| Clone ID | 1 Mb array ID | Clone name  | Chr. | Position (bp)       | Clone length (bp) | Replication timing <sup>a)</sup> | Isochore position (Mbp) <sup>b)</sup> | % GC in isochore <sup>c)</sup> | Genes $\pm$ 1 Mbp <sup>d)</sup> |
|----------|---------------|-------------|------|---------------------|-------------------|----------------------------------|---------------------------------------|--------------------------------|---------------------------------|
| 2-1e     | bA83M8        | RP11-83M8   | 2    | 10189946-10392995   | 203050            | 1.97                             | 10.1-11.2                             | 48.7                           | 34                              |
| 2-2l     | bA419E14      | RP11-419E14 | 2    | 78739646-78927111   | 187466            | 1.12                             | 76.1-78.9                             | 35.30                          | 12                              |
| 2-3l     | bA458O14      | RP11-458O14 | 2    | 79819775-79920395   | 100621            | 1.04                             | 78.9-80.9                             | 38.60                          | 13                              |
| 2-4e     | bA139J6       | RP11-139J6  | 2    | 96130286-96151127   | 20842             | 2.00                             | 96.1-97.1                             | 49                             | 47                              |
| 2-5l     | bA339P1       | RP11-339P1  | 2    | 116380901-116514763 | 133863            | 1.08                             | 115.3-118.1                           | 36.60                          | 13                              |
| 2-6l     | bA272E3       | RP11-272E3  | 2    | 165238465-165429463 | 190999            | 1.11                             | 162.9-166.3                           | 36.00                          | 12                              |
| 2-7e     | bA419H23      | RP11-419H23 | 2    | 231787899-231964428 | 176530            | 2.02                             | 231.7-232                             | 42.9                           | 40                              |

## (C) Chromosome-5-specific large-insert clone pools representing late-replicating (red) loci

| Clone ID | 1 Mb array ID | Clone name  | Chr. | Position (bp)       | Clone length (bp) | Replication timing <sup>a)</sup> | Isochore position (Mbp) <sup>b)</sup> | % GC in isochore <sup>c)</sup> | Genes $\pm$ 1 Mbp <sup>d)</sup> |
|----------|---------------|-------------|------|---------------------|-------------------|----------------------------------|---------------------------------------|--------------------------------|---------------------------------|
| 5-1l     | bA192H6       | RP11-192H6  | 5    | 25187395-25333181   | 145787            | 1.10                             | 23.2-31.6                             | 35.30                          | 4                               |
| 5-2l     | bA153B10      | RP11-153B10 | 5    | 113303877-113366022 | 62146             | 1.13                             | 113.1-114.4                           | 38.00                          | 7                               |
| 5-3l     | bA11P11       | RP11-11P11  | 5    | 121061464-121226480 | 165017            | 1.13                             | 119.2-121.4                           | 35.50                          | 11                              |
| 5-4l     | bA170P5       | RP11-170P5  | 5    | 165677723-165841050 | 163328            | 1.06                             | 165.6-166.7                           | 38.10                          | 4                               |

## (D) Chromosome-7-specific large-insert clone pools representing early-replicating (green) and late-replicating (red) loci

| Clone ID | 1 Mb array ID | Clone name | Chr. | Position (bp) | Clone length (bp) | Replication timing <sup>a)</sup> | Isochore position (Mbp) <sup>b)</sup> | % GC in isochore <sup>c)</sup> | Genes $\pm$ 1 Mbp <sup>d)</sup> |
|----------|---------------|------------|------|---------------|-------------------|----------------------------------|---------------------------------------|--------------------------------|---------------------------------|
|----------|---------------|------------|------|---------------|-------------------|----------------------------------|---------------------------------------|--------------------------------|---------------------------------|

|      |          |             |   |                     |        |      |             |       |    |
|------|----------|-------------|---|---------------------|--------|------|-------------|-------|----|
| 7-1e | bA106E3  | RP11-106E3  | 7 | 2607390-2657138     | 49749  | 2.00 | 2.5-3.1     | 47.8  | 22 |
| 7-2l | bA512E16 | RP11-512E16 | 7 | 14128072-14279388   | 151317 | 1.11 | 12.7-16.1   | 35.60 | 3  |
| 7-3e | bA450O3  | RP11-450O3  | 7 | 72073705-72269192   | 195488 | 1.94 | 71.7-73.5   | 49.9  | 48 |
| 7-4l | dJ1057M1 | RP5-1057M1  | 7 | 79539131-79644969   | 105839 | 1.06 | 79.4-80.2   | 36.40 | 8  |
| 7-5l | bA242J14 | RP11-242J14 | 7 | 83230804-83414012   | 183209 | 1.11 | 80.5-86     | 35.00 | 6  |
| 7-6l | dJ558L10 | RP4-558L10  | 7 | 145959491-146102540 | 143050 | 1.11 | 144.1-146.6 | 36.10 | 3  |

(E) Chromosome-17-specific large-insert clone pools representing early-replicating (green) loci

| Clone ID | 1 Mb array ID | Clone name  | Chr. | Position (bp)     | Clone length (bp) | Replication timing <sup>a)</sup> | Isochore position (Mbp) <sup>b)</sup> | % GC in isochore <sup>c)</sup> | Genes $\pm$ 1 Mbp <sup>d)</sup> |
|----------|---------------|-------------|------|-------------------|-------------------|----------------------------------|---------------------------------------|--------------------------------|---------------------------------|
| 17-1e    | bA216P6       | RP11-216P6  | 17   | 800495-1008155    | 207661            | 1.91                             | 0.8-1.1                               | 54.1                           | 48                              |
| 17-2e    | bA524F11      | RP11-524F11 | 17   | 17338138-17521471 | 183334            | 1.98                             | 17.3-17.7                             | 53.9                           | 62                              |
| 17-3e    | bA189D22      | RP11-189D22 | 17   | 17942719-18110985 | 168267            | 2.10                             | 17.9-18.1                             | 53.3                           | 67                              |
| 17-4e    | bK58E17       | Cancer3C7   | 17   | 33964845-34251503 | 286659            | 1.97                             | 33.8-34.2                             | 53.1                           | 50                              |
| 17-5e    | bA58O9        | RP11-58O9   | 17   | 35754712-35920945 | 166234            | 1.96                             | 35-36                                 | 49.2                           | 95                              |
| 17-6e    | bA141D15      | RP11-141D15 | 17   | 73636218-73813841 | 177624            | 2.11                             | 73.6-74                               | 54                             | 47                              |
| 17-7e    | bA567O16      | RP11-567O16 | 17   | 78311474-78374827 | 63354             | 1.99                             | 76.4-78.8                             | 55.8                           | 52                              |
