# Supplementary material
Source: PubMed Central journal article supplement (PMC2880010)
Supplement: supp_121_11_1876__2.pdf [file supp_121_11_1876__2.pdf]

**Table S2.** Statistical analysis of 3RRD (relative radial distribution) and eADS (absolute distance to surface) evaluations obtained from 3D-FISH experiments (ARR=average relative radius in %, 0%=nuclear centre, 100%=nuclear border; ADS= absolute distance to surface in nm; n=evaluated nuclei; sem=standard error of the mean, *P*-values in green=distribution difference statistically significant, *P*-values in blue=distribution difference statistically not significant).

(A) Chromosome 1-22 and X large-insert clone probe set

**ADS nucleus**

| Cell line         | n  | Early clones: ADS $\pm$ sem | Late clones: ADS $\pm$ sem | $\Delta$ ADS | <i>P</i> (U-test) |
|-------------------|----|-----------------------------|----------------------------|--------------|-------------------|
| Human fibroblasts | 21 | 989 nm $\pm$ 3.2 nm         | 869 nm $\pm$ 3.6 nm        | 120 nm       | <i>P</i> = 0.039  |
| Mel Juso          | 22 | 1703 nm $\pm$ 3.1 nm        | 1364 nm $\pm$ 3.7 nm       | 339 nm       | <i>P</i> < 0.001  |
| SW620             | 22 | 1640 nm $\pm$ 2.9 nm        | 1255 nm $\pm$ 3.3 nm       | 385 nm       | <i>P</i> < 0.001  |

**ARR nucleus**

| Cell line         | n  | Early clones: ARR $\pm$ sem | Late clones: ARR $\pm$ sem | $\Delta$ ARR | <i>P</i> (U-test) |
|-------------------|----|-----------------------------|----------------------------|--------------|-------------------|
| Human fibroblasts | 21 | 63.1% $\pm$ 0.4%            | 61.2% $\pm$ 0.4%           | -1.9%        | <i>P</i> = 0.246  |
| Mel Juso          | 22 | 60.0% $\pm$ 0.4%            | 61.7% $\pm$ 0.4%           | 1.7%         | <i>P</i> = 0.269  |
| SW620             | 22 | 58.9% $\pm$ 0.4%            | 63.8% $\pm$ 0.4%           | 4.9%         | <i>P</i> = 0.007  |

(B) Chromosome 1-22 and X large-insert clone probe set combined with double pulse labeling for the delineation of early and late replication foci

**ADS nucleus**

| Cell line         | n | Early clones: ADS $\pm$ sem | Late clones: ADS $\pm$ sem | $\Delta$ ADS | <i>P</i> (U-test) |
|-------------------|---|-----------------------------|----------------------------|--------------|-------------------|
| Human fibroblasts | 8 | 988 nm $\pm$ 5.1 nm         | 698 nm $\pm$ 5.5 nm        | -290 nm      | <i>P</i> = 0.038  |

| Cell line         | n | Early Foci: ADS $\pm$ sem | Late Foci: ADS $\pm$ sem | $\Delta$ ADS | <i>P</i> (U-test) |
|-------------------|---|---------------------------|--------------------------|--------------|-------------------|
| Human fibroblasts | 8 | 906 nm $\pm$ 4.9 nm       | 995 nm $\pm$ 5.0 nm      | -89 nm       | <i>P</i> = 0.234  |

| Cell line         | n | Early clones: ADS $\pm$ sem | Early Foci: ADS $\pm$ sem | $\Delta$ ADS | <i>P</i> (U-test) |
|-------------------|---|-----------------------------|---------------------------|--------------|-------------------|
| Human fibroblasts | 8 | 988 nm $\pm$ 5.1 nm         | 906 nm $\pm$ 4.9 nm       | 82 nm        | <i>P</i> = 0.279  |

| Cell line         | n | Late clones: ADS $\pm$ sem | Late Foci: ADS $\pm$ sem | $\Delta$ ADS | <i>P</i> (U-test) |
|-------------------|---|----------------------------|--------------------------|--------------|-------------------|
| Human fibroblasts | 8 | 698 nm $\pm$ 5.5 nm        | 995 nm $\pm$ 5.0 nm      | -297 nm      | <i>P</i> = 0.038  |

| Cell line         | n | Counterstain: ADS $\pm$ sem | Early Foci: ADS $\pm$ sem | $\Delta$ ADS | <i>P</i> (U-test) |
|-------------------|---|-----------------------------|---------------------------|--------------|-------------------|
| Human fibroblasts | 8 | 577 nm $\pm$ 3.7 nm         | 906 nm $\pm$ 4.9 nm       | -329 nm      | <i>P</i> = 0.005  |

| Cell line         | n | Counterstain: ADS $\pm$ sem | Early clones: ADS $\pm$ sem | $\Delta$ ADS | <i>P</i> (U-test) |
|-------------------|---|-----------------------------|-----------------------------|--------------|-------------------|
| Human fibroblasts | 8 | 577 nm $\pm$ 3.7 nm         | 988 nm $\pm$ 5.1 nm         | -411 nm      | <i>P</i> = 0.003  |

| Cell line         | n | Counterstain: ADS $\pm$ sem | Late Foci: ADS $\pm$ sem | $\Delta$ ADS | <i>P</i> (U-test) |
|-------------------|---|-----------------------------|--------------------------|--------------|-------------------|
| Human fibroblasts | 8 | 577 nm $\pm$ 3.7 nm         | 995 nm $\pm$ 5.0 nm      | -418 nm      | <i>P</i> = 0.003  |

| Cell line         | n | Counterstain: ADS $\pm$ sem | Late clones: ADS $\pm$ sem | $\Delta$ ADS | <i>P</i> (U-test) |
|-------------------|---|-----------------------------|----------------------------|--------------|-------------------|
| Human fibroblasts | 8 | 577 nm $\pm$ 3.7 nm         | 698 nm $\pm$ 5.5 nm        | -121 nm      | <i>P</i> = 0.161  |

(C) Chromosome 2 large-insert clone probe set

**ARR nucleus**

| Cell line | n | Early clones: ARR | Late clones: ARR | $\Delta$ ARR | <i>P</i> (U-test) |
|-----------|---|-------------------|------------------|--------------|-------------------|
|-----------|---|-------------------|------------------|--------------|-------------------|

|                         |    | $\pm$ sem         | $\pm$ sem         |      |             |
|-------------------------|----|-------------------|-------------------|------|-------------|
| Human fibroblasts       | 20 | 64.4% $\pm$ 0.99% | 68.3% $\pm$ 0.94% | 3.9% | $P = 0.239$ |
| Human lymphoblastoids   | 22 | 59.3% $\pm$ 0.84% | 62.8% $\pm$ 1.06% | 3.5% | $P = 0.330$ |
| Gorilla lymphoblastoids | 25 | 60.7% $\pm$ 0.76% | 64.3% $\pm$ 0.91% | 3.6% | $P = 0.140$ |

| Cell line                         | n        | Early clones human ly:<br>ARR $\pm$ sem | Early clones gorilla ly:<br>ARR $\pm$ sem | $\Delta$ ARR | $P$ (U-test) |
|-----------------------------------|----------|-----------------------------------------|-------------------------------------------|--------------|--------------|
| Human vs. gorilla lymphoblastoids | 22<br>25 | 59.3% $\pm$ 0.84%                       | 60.7% $\pm$ 0.76%                         | -1.4%        | $P = 0.072$  |

| Cell line                         | n        | Late clones human ly:<br>ARR $\pm$ sem | Late clones gorilla ly:<br>ARR $\pm$ sem | $\Delta$ ARR | $P$ (U-test) |
|-----------------------------------|----------|----------------------------------------|------------------------------------------|--------------|--------------|
| Human vs. gorilla lymphoblastoids | 22<br>25 | 62.8% $\pm$ 1.06%                      | 64.3% $\pm$ 0.91%                        | -1.5%        | $P = 0.502$  |

| Cell line                                   | n        | Early clones human fib:<br>ARR $\pm$ sem | Early clones human ly:<br>ARR $\pm$ sem | $\Delta$ ARR | $P$ (U-test) |
|---------------------------------------------|----------|------------------------------------------|-----------------------------------------|--------------|--------------|
| Human fibroblasts vs. human lymphoblastoids | 22<br>25 | 64.4% $\pm$ 0.99%                        | 59.3% $\pm$ 0.84%                       | 5.1%         | $P = 0.085$  |

| Cell line                                   | n        | Late clones human fib:<br>ARR $\pm$ sem | Late clones human ly:<br>ARR $\pm$ sem | $\Delta$ ARR | $P$ (U-test) |
|---------------------------------------------|----------|-----------------------------------------|----------------------------------------|--------------|--------------|
| Human fibroblasts vs. human lymphoblastoids | 22<br>25 | 68.3% $\pm$ 0.94%                       | 62.8% $\pm$ 1.06%                      | 5.5%         | $P = 0.252$  |

| Cell line         | n  | clone 2-3l: ARR $\pm$ sem | clone 2-6l: ARR $\pm$ sem | $\Delta$ ARR | $P$ (U-test) |
|-------------------|----|---------------------------|---------------------------|--------------|--------------|
| Human fibroblasts | 20 | 60.2% $\pm$ 1.72%         | 70.3% $\pm$ 0.45%         | 10.1%        | $P = 0.002$  |

#### ADS chromosome 2 territory

| Cell line             | n  | Early clones:<br>ADS $\pm$ sem | Late clones: ADS $\pm$ sem | $\Delta$ ADS | $P$ (U-test) |
|-----------------------|----|--------------------------------|----------------------------|--------------|--------------|
| Human fibroblasts     | 26 | 377 nm $\pm$ 3.7 nm            | 500 nm $\pm$ 2.9 nm        | -123 nm      | $P = 0.134$  |
| Human lymphoblastoids | 16 | 330 nm $\pm$ 4.4 nm            | 300 nm $\pm$ 3.7 nm        | +30 nm       | $P = 0.734$  |

#### (D) Chromosome 5 and 17 BAC probe set

##### ARR nucleus

| Cell line               | n  | Early clones chr. 17:<br>ARR $\pm$ sem | Late clones chr. 5:<br>ARR $\pm$ sem | $\Delta$ ARR | $P$ (U-test) |
|-------------------------|----|----------------------------------------|--------------------------------------|--------------|--------------|
| Human fibroblasts       | 24 | 54.8% $\pm$ 0.79%                      | 70.4% $\pm$ 0.99%                    | 15.6%        | $P < 0.001$  |
| Human lymphoblastoids   | 21 | 40.9% $\pm$ 0.72%                      | 66.8% $\pm$ 1.04%                    | 25.9%        | $P < 0.001$  |
| Gorilla fibroblasts     | 22 | 58.8% $\pm$ 0.76%                      | 66.3% $\pm$ 0.81%                    | 7.5%         | $P = 0.004$  |
| Gorilla lymphoblastoids | 20 | 50.9% $\pm$ 0.75%                      | 66.1% $\pm$ 1.04%                    | 15.2%        | $P < 0.001$  |
| Gibbon lymphoblastoids  | 22 | 51.9% $\pm$ 0.84%                      | 68.5% $\pm$ 0.91                     | 16.6%        | $P < 0.001$  |

| Cell line | n  | Early clones chr. 17:<br>ARR $\pm$ sem | Early clones der(17):<br>ARR $\pm$ sem | $\Delta$ ARR | $P$ (U-test) |
|-----------|----|----------------------------------------|----------------------------------------|--------------|--------------|
| Mel Juso  | 21 | 57.7 $\pm$ 0.83                        | 51.7 $\pm$ 0.82                        | 6.0%         | $P = 0.027$  |

| Cell line | n  | Chr. 17 territory:<br>ARR $\pm$ sem | der(17) territory:<br>ARR $\pm$ sem | $\Delta$ ARR | $P$ (U-test) |
|-----------|----|-------------------------------------|-------------------------------------|--------------|--------------|
| Mel Juso  | 21 | 59.3 $\pm$ 0.61                     | 64.7 $\pm$ 0.47                     | 5.4%         | $P = 0.019$  |

| Cell line | n | clone 7-1e: ARR $\pm$ sem | clones 7-2l/5-1l: ARR $\pm$ sem | $\Delta$ ARR | $P$ (U-test) |
|-----------|---|---------------------------|---------------------------------|--------------|--------------|
|-----------|---|---------------------------|---------------------------------|--------------|--------------|

|                    |    |              |              |       |                  |
|--------------------|----|--------------|--------------|-------|------------------|
| SW620 t(5p7p)      | 18 | 60.6% ±2.19% | 75.4% ±1.65% | 14.8% | <i>P</i> = 0.009 |
| SW620 chr. 5 and 7 | 20 | 60.7% ±1.31% | 69.7% ±1.06% | 9.0%  | <i>P</i> = 0.015 |

| Cell line                      | n        | clone 7-1e: ARR ±sem | clone 7-1e: ARR ±sem | Δ ARR | <i>P</i> (U-test) |
|--------------------------------|----------|----------------------|----------------------|-------|-------------------|
| SW620 t(5p7p) vs. chr. 5 and 7 | 18<br>20 | 60.6% ±2.19%         | 60.7% ±1.31%         | -0.1% | <i>P</i> = 0.783  |

| Cell line                      | n        | clones 7-2l/5-1l: ARR ±sem | clones 7-2l/5-1l: ARR ±sem | Δ ARR | <i>P</i> (U-test) |
|--------------------------------|----------|----------------------------|----------------------------|-------|-------------------|
| SW620 t(5p7p) vs. chr. 5 and 7 | 18<br>20 | 75.4% ±1.65%               | 69.7% ±1.06%               | 5.7%  | <i>P</i> = 0.027  |

#### ADS chromosome 5 and 17 territory

| Cell line                         | n  | Early clones chr. 17: ADS ±sem | Late clones chr. 5: ADS ±sem | Δ ADS   | <i>P</i> (U-test) |
|-----------------------------------|----|--------------------------------|------------------------------|---------|-------------------|
| Human fibroblasts                 | 25 | 178 nm ±3.5 nm                 |                              | n.d.    | n.d.              |
|                                   | 29 |                                | 634 nm ±3.7 nm               |         | n.d.              |
| Gorilla fibroblasts t(5;17) large | 23 | 469 nm ±3.3 nm                 | 806 nm ±3.2 nm               | -377 nm | <i>P</i> < 0.001  |
| Gorilla fibroblasts t(5;17) small | 23 | 310 nm ±4.3 nm                 | 691 nm ±3.6 nm               | -381 nm | <i>P</i> < 0.001  |

#### (E) Chromosome 7 BAC probe set

##### ARR nucleus

| Cell line                 | n  | Early clones: ARR ±sem | Late clones: ARR ±sem | Δ ARR | <i>P</i> (U-test) |
|---------------------------|----|------------------------|-----------------------|-------|-------------------|
| Human fibroblasts         | 20 | 54.4% ±1.01%           | 67.5% ±1.01%          | 13.1% | <i>P</i> = 0.026  |
| Human lymphoblastoids     | 22 | 56.9% ±0.88%           | 68.4% ±0.90%          | 11.5% | <i>P</i> < 0.001  |
| Orangutan lymphoblastoids | 20 | 50.6% ±1.03%           | 69.7% ±1.03%          | 19.1% | <i>P</i> < 0.001  |
| Gibbon lymphoblastoids    | 20 | 54.4% ±1.01%           | 67.5% ±1.01%          | 13.1% | <i>P</i> < 0.001  |
| Karpas 384 chr. 7         | 22 | 64.3% ±1.01%           | 78.0% ±0.95%          | 13.7% | <i>P</i> < 0.001  |
| Karpas 384 der(7)         | 22 | 62.5% ±1.34%           | 70.9% ±1.35%          | 8.4%  | <i>P</i> = 0.002  |

| Cell line                    | n  | Early clones: ARR ±sem | Early clones: ARR ±sem | Δ ARR | <i>P</i> (U-test) |
|------------------------------|----|------------------------|------------------------|-------|-------------------|
| Karpas 384 der(7) vs. chr. 7 | 22 | 62.5% ±1.34%           | 64.3% ±1.01%           | -1.8% | <i>P</i> = 0.972  |

| Cell line                    | n  | Late clones: ARR ±sem | Late clones: ARR ±sem | Δ ARR | <i>P</i> (U-test) |
|------------------------------|----|-----------------------|-----------------------|-------|-------------------|
| Karpas 384 der(7) vs. chr. 7 | 22 | 70.9% ±1.35%          | 78.0% ±0.95%          | -7.1% | <i>P</i> = 0.065  |

| Cell line        | n  | clone 7-1e: ARR ±sem | clone 7-2l: ARR ±sem | Δ ARR | <i>P</i> (U-test) |
|------------------|----|----------------------|----------------------|-------|-------------------|
| Mel Juso iso(7p) | 20 | 64.5% ±1.24%         | 67.5% ±0.72%         | 3.0%  | <i>P</i> = 0.032  |
| Mel Juso chr. 7  | 20 | 63.0% ±1.43          | 65.0% ±0.72%         | 2.0%  | <i>P</i> = 0.164  |

| Cell line                  | n  | clone 7-1e: ARR ±sem | clone 7-1e: ARR ±sem | Δ ARR | <i>P</i> (U-test) |
|----------------------------|----|----------------------|----------------------|-------|-------------------|
| Mel Juso iso(7p) vs chr. 7 | 20 | 64.5% ±1.24%         | 63.0% ±1.43          | 1.5%  | <i>P</i> = 0.797  |

| Cell line                  | n  | clone 7-2l: ARR ±sem | clone 7-2l: ARR ±sem | Δ ARR | <i>P</i> (U-test) |
|----------------------------|----|----------------------|----------------------|-------|-------------------|
| Mel Juso iso(7p) vs chr. 7 | 20 | 67.5% ±0.72%         | 65.0% ±0.72%         | 2.5%  | <i>P</i> = 0.441  |

| Cell line         | n  | 7-1e: ARR ±sem | 7-2l: ARR ±sem | Δ ARR | <i>P</i> (U-test) |
|-------------------|----|----------------|----------------|-------|-------------------|
| Human fibroblasts | 22 | 60.6% ±1.52%   | 64.3% ±1.55%   | -3.7% | <i>P</i> = 0.614  |

| Cell line             | n  | 7-2l: ARR $\pm$ sem | 7-3e: ARR $\pm$ sem | $\Delta$ ARR | P (U-test)       |
|-----------------------|----|---------------------|---------------------|--------------|------------------|
| Human fibroblasts     | 22 | 64.3% $\pm$ 1.55%   | 64.2% $\pm$ 1.59%   | 0.1%         | <i>P</i> = 0.952 |
| Cell line             | n  | 7-3e: ARR $\pm$ sem | 7-4l: ARR $\pm$ sem | $\Delta$ ARR | P (U-test)       |
| Human fibroblasts     | 22 | 64.2% $\pm$ 1.59%   | 66.4% $\pm$ 1.49%   | -2.2%        | <i>P</i> = 0.653 |
| Cell line             | n  | 7-4l: ARR $\pm$ sem | 7-6l: ARR $\pm$ sem | $\Delta$ ARR | P (U-test)       |
| Human fibroblasts     | 22 | 66.4% $\pm$ 1.49%   | 75.6% $\pm$ 1.61%   | -9.2%        | <i>P</i> = 0.025 |
| Cell line             | n  | 7-1e: ARR $\pm$ sem | 7-3l: ARR $\pm$ sem | $\Delta$ ARR | P (U-test)       |
| Human fibroblasts     | 22 | 60.6% $\pm$ 1.52%   | 64.2% $\pm$ 1.59%   | -4.0%        | <i>P</i> = 0.459 |
| Cell line             | n  | 7-1e: ARR $\pm$ sem | 7-4l: ARR $\pm$ sem | $\Delta$ ARR | P (U-test)       |
| Human fibroblasts     | 22 | 60.6% $\pm$ 1.52%   | 66.4% $\pm$ 1.49%   | -5.8%        | <i>P</i> = 0.201 |
| Cell line             | n  | 7-1e: ARR $\pm$ sem | 7-6l: ARR $\pm$ sem | $\Delta$ ARR | P (U-test)       |
| Human fibroblasts     | 22 | 60.6% $\pm$ 1.52%   | 75.6% $\pm$ 1.61%   | -15.0%       | <i>P</i> = 0.001 |
| Cell line             | n  | 7-2l: ARR $\pm$ sem | 7-4l: ARR $\pm$ sem | $\Delta$ ARR | P (U-test)       |
| Human fibroblasts     | 22 | 64.3% $\pm$ 1.55%   | 66.4% $\pm$ 1.49%   | -1.9%        | <i>P</i> = 0.489 |
| Cell line             | n  | 7-2l: ARR $\pm$ sem | 7-6l: ARR $\pm$ sem | $\Delta$ ARR | P (U-test)       |
| Human fibroblasts     | 22 | 64.3% $\pm$ 1.55%   | 75.6% $\pm$ 1.61%   | -11.3%       | <i>P</i> = 0.019 |
| Cell line             | n  | 7-3e: ARR $\pm$ sem | 7-6l: ARR $\pm$ sem | $\Delta$ ARR | P (U-test)       |
| Human fibroblasts     | 22 | 64.2% $\pm$ 1.59%   | 75.6% $\pm$ 1.61%   | -11.4%       | <i>P</i> = 0.013 |
| Cell line             | n  | 7-1e: ARR $\pm$ sem | 7-2l: ARR $\pm$ sem | $\Delta$ ARR | P (U-test)       |
| Orangutan fibroblasts | 22 | 60.4% $\pm$ 1.49%   | 71.9% $\pm$ 1.52%   | -11.5%       | <i>P</i> = 0.008 |
| Cell line             | n  | 7-2l: ARR $\pm$ sem | 7-3e: ARR $\pm$ sem | $\Delta$ ARR | P (U-test)       |
| Orangutan fibroblasts | 22 | 71.9% $\pm$ 1.52%   | 65.1% $\pm$ 1.97%   | 6.8%         | <i>P</i> = 0.130 |
| Cell line             | n  | 7-3e: ARR $\pm$ sem | 7-4l: ARR $\pm$ sem | $\Delta$ ARR | P (U-test)       |
| Orangutan fibroblasts | 22 | 65.1% $\pm$ 1.97%   | 74.0% $\pm$ 1.59%   | -9.1%        | <i>P</i> = 0.054 |
| Cell line             | n  | 7-4l: ARR $\pm$ sem | 7-6l: ARR $\pm$ sem | $\Delta$ ARR | P (U-test)       |
| Orangutan fibroblasts | 22 | 74.0% $\pm$ 1.59%   | 79.2% $\pm$ 1.86%   | -5.2%        | <i>P</i> = 0.330 |
| Cell line             | n  | 7-1e: ARR $\pm$ sem | 7-3e: ARR $\pm$ sem | $\Delta$ ARR | P (U-test)       |
| Orangutan fibroblasts | 22 | 60.4% $\pm$ 1.49%   | 65.1% $\pm$ 1.97%   | -4.7%        | <i>P</i> = 0.321 |
| Cell line             | n  | 7-1e: ARR $\pm$ sem | 7-4l: ARR $\pm$ sem | $\Delta$ ARR | P (U-test)       |
| Orangutan fibroblasts | 22 | 60.4% $\pm$ 1.49%   | 74.0% $\pm$ 1.59%   | -13.6%       | <i>P</i> = 0.003 |
| Cell line             | n  | 7-1e: ARR $\pm$ sem | 7-6l: ARR $\pm$ sem | $\Delta$ ARR | P (U-test)       |
| Orangutan fibroblasts | 22 | 60.4% $\pm$ 1.49%   | 79.2% $\pm$ 1.86%   | -18.8%       | <i>P</i> = 0.003 |
| Cell line             | n  | 7-2e: ARR $\pm$ sem | 7-4l: ARR $\pm$ sem | $\Delta$ ARR | P (U-test)       |
| Orangutan fibroblasts | 22 | 71.9% $\pm$ 1.52%   | 74.0% $\pm$ 1.59%   | -2.1%        | <i>P</i> = 0.580 |
| Cell line             | n  | 7-2l: ARR $\pm$ sem | 7-6l: ARR $\pm$ sem | $\Delta$ ARR | P (U-test)       |
| Orangutan fibroblasts | 22 | 71.9% $\pm$ 1.52%   | 79.2% $\pm$ 1.86%   | -7.3%        | <i>P</i> = 0.176 |
| Cell line             | n  | 7-3l: ARR $\pm$ sem | 7-6l: ARR $\pm$ sem | $\Delta$ ARR | P (U-test)       |
| Orangutan fibroblasts | 22 | 65.1% $\pm$ 1.97%   | 79.2% $\pm$ 1.86%   | -14.1%       | <i>P</i> = 0.027 |

| Cell line                       | n  | 7-1e HSA: ARR $\pm$ sem | 7-1e PPY: ARR $\pm$ sem | $\Delta$ ARR | P (U-test)       |
|---------------------------------|----|-------------------------|-------------------------|--------------|------------------|
| Human vs. Orangutan fibroblasts | 22 | 60.6% $\pm$ 1.52%       | 60.4% $\pm$ 1.49%       | 0.2%         | <i>P</i> = 0.808 |

| Cell line                       | n  | 7-2l HSA: ARR $\pm$ sem | 7-2l PPY: ARR $\pm$ sem | $\Delta$ ARR | P (U-test)       |
|---------------------------------|----|-------------------------|-------------------------|--------------|------------------|
| Human vs. Orangutan fibroblasts | 22 | 64.3% $\pm$ 1.52%       | 71.9% $\pm$ 1.45%       | -7.6%        | <i>P</i> = 0.082 |

| Cell line                       | n  | 7-3e HSA: ARR $\pm$ sem | 7-3e PPY: ARR $\pm$ sem | $\Delta$ ARR | P (U-test)       |
|---------------------------------|----|-------------------------|-------------------------|--------------|------------------|
| Human vs. Orangutan fibroblasts | 22 | 64.2% $\pm$ 1.59%       | 65.1% $\pm$ 1.97%       | -0.9%        | <i>P</i> = 0.837 |

| Cell line                       | n  | 7-4l HSA: ARR $\pm$ sem | 7-4l PPY: ARR $\pm$ sem | $\Delta$ ARR | P (U-test)       |
|---------------------------------|----|-------------------------|-------------------------|--------------|------------------|
| Human vs. Orangutan fibroblasts | 22 | 66.4% $\pm$ 1.49%       | 74.0% $\pm$ 1.52%       | -7.6%        | <i>P</i> = 0.070 |

| Cell line                       | n  | 7-6l HSA: ARR $\pm$ sem | 7-6l PPY: ARR $\pm$ sem | $\Delta$ ARR | P (U-test)       |
|---------------------------------|----|-------------------------|-------------------------|--------------|------------------|
| Human vs. Orangutan fibroblasts | 22 | 75.6% $\pm$ 1.61%       | 79.2% $\pm$ 1.86%       | -3.6%        | <i>P</i> = 0.602 |

#### ADS chromosome 7 territory

| Cell line                 | n  | Early clones: ADS $\pm$ sem | Late clones chr. 5: ADS $\pm$ sem | $\Delta$ ADS | P (U-test)       |
|---------------------------|----|-----------------------------|-----------------------------------|--------------|------------------|
| Human fibroblasts         | 28 | 333 nm $\pm$ 3.6 nm         | 369 nm $\pm$ 3.4 nm               | 36 nm        | <i>P</i> = 0.812 |
| Human lymphoblastoids     | 24 | 581 nm $\pm$ 3.3 nm         | 622 nm $\pm$ 3.6 nm               | 41 nm        | <i>P</i> = 0.743 |
| Orangutan lymphoblastoids | 24 | 190 nm $\pm$ 4.3 nm         | 638 nm $\pm$ 3.4 nm               | 448 nm       | <i>P</i> < 0.001 |
