# Supplementary material
Source: PubMed Central journal article supplement (PMC2880010)
Supplement: supp_121_15_2540__1.pdf [file supp_121_15_2540__1.pdf]

Table S1. Primer pairs for plasmid construction

---

|       |                                                           |
|-------|-----------------------------------------------------------|
| lam-1 | 5'- <u>GCGAATTC</u> (EcoRI)GATGGAGACCCCGTCCC-3'           |
| lam-2 | 5'- <u>CCGGATCC</u> (BamHI)TTACATGATGCTGCAGTTC-3'         |
| cfp-1 | 5'-GAT <u>GCTAGC</u> (NheI)ATGGTGAGCAAGGGCGAGGAG-3'       |
| cfp-2 | 5'-CGA <u>AGATCT</u> (BglII)CTTGACAGCTCGTCCATGCC-3'       |
| baf-1 | 5'- <u>CGGTCGAC</u> (SalI)GAGCAGCCATCATCATCAT-3'          |
| baf-2 | 5'- <u>CCGGATCC</u> (BamHI)CTACAAGAAGGCATCACACCAT-3'      |
| eme-1 | 5'- <u>CCGGATTC</u> (BamHI)ATGGACAACACTACGCAGATCTTTTCG-3' |
| eme-2 | 5' <u>GCCGGATCC</u> (BamHI)CTAGAAGGGGTTGCCTTCTTCAGCC-3'   |
| lam-3 | 5'- <u>CCGGTTCGAC</u> (SalI)ATGGAGACCCCGTCCCAGCGG-3'      |
| lam-4 | 5'- <u>GCCGTCGAC</u> (SalI)TTACATGATGCTGCAGTTCTGGGG-3'    |
| nup-1 | 5'-ATGGCAGCCTTTGCAGTGGAACCTC-3'                           |
| nup-2 | 5'-CTACCAGCCAAACATGTACTCCATT-3'                           |

---

Underlines indicate artificially added restriction sites.
