# Supplementary material
Source: PubMed Central journal article supplement (PMC2880010)
Supplement: supp_123_1_29__6.pdf [file supp_123_1_29__6.pdf]

**Table S1. Surface concentration of FBS adsorbed onto the different polyelectrolyte multilayer films**

| <b>Polyelectrolyte multilayer films</b> | <b>Changes in the resonance frequency, <math>\Delta f</math>, during FBS 10% deposition</b> | <b>Mass increment (ng cm<sup>-2</sup>)</b> |
|-----------------------------------------|---------------------------------------------------------------------------------------------|--------------------------------------------|
| Bare crystal (SiO <sub>2</sub> )        | 38.0                                                                                        | 672                                        |
| (PAH/PSS) <sub>2</sub> /PAH             | 45.9                                                                                        | 812                                        |
| (PAH/PSS) <sub>4</sub> /PAH             | 57.3                                                                                        | 1014                                       |
| (PAH/PSS) <sub>6</sub> /PAH             | 40.2                                                                                        | 712                                        |
| (PLL/HA) <sub>4</sub> /PLL              | 47.8                                                                                        | 846                                        |
| Mean value                              | 45.8                                                                                        | <b>811 ± 166</b>                           |

Changes in the resonance frequency,  $\Delta f$ , during each adsorption step are measured.

The estimated error on the mean value of the mass increment corresponds to 95% confidence interval.
