# Supplementary material
Source: PubMed Central journal article supplement (PMC2880010)
Supplement: supp_123_1_141__1.pdf [file supp_123_1_141__1.pdf]

**Table S1.** Strains and plasmids used in this study

| <b>Strain name</b> | <b>Relevant genotype</b>                                                             | <b>Source</b>            |
|--------------------|--------------------------------------------------------------------------------------|--------------------------|
| FY23               | <i>MATa trp1Δ63 leu2Δ1 ura3-52</i>                                                   | (Winston et al., 1995)   |
| BY4742 (wt)        | <i>MATα his3 ura3Δ0 leu2Δ0 lys2</i>                                                  | Research Genetics        |
| <i>APQ12-GFP</i>   | <i>MATa his3 ura3Δ0 leuΔ0 met15Δ0 APQ12-GFP::kan<sup>R</sup></i>                     | Invitrogen               |
| <i>apq12Δ</i>      | <i>MATα his3 ura3Δ0 leu2Δ0 lys2 APQ12::KAN<sup>R</sup></i>                           | Research Genetics        |
| <i>arv1Δ</i>       | <i>MATa his3 ura3Δ0 leu2Δ0 lys2 Avr1::KAN<sup>R</sup></i>                            | Research Genetics        |
| <i>erg2Δ</i>       | <i>MATa his3 ura3Δ0 leu2Δ0 lys2 Erg2::KAN<sup>R</sup></i>                            | Research Genetics        |
| <i>erg3Δ</i>       | <i>MATa his3 ura3Δ0 leu2Δ0 lys2 Erg3::KAN<sup>R</sup></i>                            | Research Genetics        |
| <i>erg4Δ</i>       | <i>MATa his3 ura3Δ0 leu2Δ0 lys2 Erg4::KAN<sup>R</sup></i>                            | Research Genetics        |
| <i>erg5Δ</i>       | <i>MATa his3 ura3Δ0 leu2Δ0 lys2 Erg5::KAN<sup>R</sup></i>                            | Research Genetics        |
| <i>erg6Δ</i>       | <i>MATa his3 ura3Δ0 leu2Δ0 lys2 Erg6::KAN<sup>R</sup></i>                            | Research Genetics        |
| <i>elo1Δ</i>       | <i>MATa his3 ura3Δ0 leu2Δ0 lys2 Elo1::KAN<sup>R</sup></i>                            | Research Genetics        |
| <i>elo2Δ</i>       | <i>MATa his3 ura3Δ0 leu2Δ0 lys2 Elo2::KAN<sup>R</sup></i>                            | Research Genetics        |
| <i>elo3Δ</i>       | <i>MATa his3 ura3Δ0 leu2Δ0 lys2 Elo3::KAN<sup>R</sup></i>                            | Research Genetics        |
| <i>spo7Δ</i>       | <i>MATa his3 ura3Δ0 leu2Δ0 lys2 Spo7::KAN<sup>R</sup></i>                            | Research Genetics        |
| <i>spo14Δ</i>      | <i>MATa his3 ura3Δ0 leu2Δ0 lys2 Spo14::KAN<sup>R</sup></i>                           | Research Genetics        |
| <i>nem1Δ</i>       | <i>MATa his3 ura3Δ0 leu2Δ0 lys2 Nem1::KAN<sup>R</sup></i>                            | Research Genetics        |
| <i>mga2Δ</i>       | <i>MATa his3 ura3Δ0 leu2Δ0 lys2 MGA2::KAN<sup>R</sup></i>                            | Research Genetics        |
| <i>spt23Δ</i>      | <i>MATa his3 ura3Δ0 leu2Δ0 lys2 SPT23::KAN<sup>R</sup></i>                           | Research Genetics        |
| LGY103             | <i>MATa rat7-1 his3_200 ura3-52 leu2_1</i>                                           | (Gorsch et al., 1995)    |
| CHY244             | <i>M A T a rat7ΔN his3_200ura3-52 leu2 Itrp1Δ63</i>                                  | (Scarcelli et al., 2007) |
| CSY538             | <i>his3-200 leu 2Δ0 ura3-53 brr6::His NUP82-GFP::kan<sup>R</sup> pBRR6 (URA CEN)</i> | This study               |
| CSY539             | <i>his3-200 leu 2Δ0 ura3-53 brr6::His NUP60-GFP::kan<sup>R</sup> pBRR6 (URA CEN)</i> | This study               |

|                     |                                                                                                                                   |                                   |
|---------------------|-----------------------------------------------------------------------------------------------------------------------------------|-----------------------------------|
| Nup60-GFP           | <i>MATα his3 ura3Δ0 leuΔ0 met15Δ0 NUP60-GFP::kan<sup>R</sup></i>                                                                  | Invitrogen                        |
| Nup82-GFP           | <i>MATα his3 ura3Δ0 leuΔ0 met15Δ0 NUP82-GFP::kan<sup>R</sup></i>                                                                  | Invitrogen                        |
| RSY3018             | <i>MATα his3Δ1 leu2Δ0 lys2Δ0 ura3Δ0 met15Δ0 trp1Δ are1::kan<sup>R</sup> are2::kan<sup>R</sup></i>                                 | This study                        |
| RSY3552             | <i>MATα his3Δ1 leu2Δ0 lys2Δ0 ura3Δ0 hem1::LEU2 apq12::kan<sup>R</sup></i>                                                         | This study                        |
| RSY3786             | <i>MATα ade2-1 ura3-1 his3-11,15 trp1-1 leu2-3,112 hem1::TRP1 brr6::HIS3/brr6-1(LEU2</i>                                          | This study                        |
| RSY2033             | <i>MATα his3Δ1 leu2Δ0 lys2Δ0 ura3Δ0 hem1::LEU2</i>                                                                                | (Reiner et al., 2006)             |
| RSY3785             | <i>MATα ade2-1 ura3-1 his3-11,15 trp1-1 leu2-3,112 brr6::HIS3/brr6-1(LEU2) are1::LoxP are2::LoxP</i>                              | This study                        |
| RSY4186             | <i>MATα ade2-1 ura3-1 his3-11,15 trp1-1 leu2-3,112 brr6::HIS3/brr6-1(LEU2) pBRR6 (2μm, URA3) lro1::kan<sup>R</sup></i>            | This study                        |
| RSY4183             | <i>MATα ade2-1 ura3-1 his3-11,15 trp1-1 leu2-3,112 brr6::HIS3/brr6-1(LEU2) pBRR6 (2μm, URA3) lro1::kan<sup>R</sup> dga1::loxP</i> | This study                        |
| RSY4185             | <i>MATα ade2-1 ura3-1 his3-11,15 trp1-1 leu2-3,112 brr6::HIS3/brr6-1(LEU2) pBRR6 (2μm, URA3) dga1::loxP</i>                       | This study                        |
| yDBK166             | <i>MATα ade2-1 ura3-1 his3-11,15 trp1-1 leu2-3,112 brr6::HIS3/brr6-1(LEU2)</i>                                                    | (de Bruyn Kops and Guthrie, 2001) |
| JSy050              | <i>his3 ura3Δ0 leu2Δ0 NUP82-GFP::HIS3 apq12::KAN<sup>R</sup></i>                                                                  | (Scarcelli et al., 2007)          |
| JSy068              | <i>his3 ura3Δ0 leu2Δ0 NUP188-GFP::HIS3 apq12::KAN<sup>R</sup></i>                                                                 | (Scarcelli et al., 2007)          |
| MWY1                | <i>MATα his3_200 ura3-52 leu2_1 trp1Δ63 BRR6::HIS3 pBRR6 (URA3/CEN)</i>                                                           | This study                        |
| MWY2                | <i>MATα his3_200 ura3-52 leu2_1 trp1Δ63 BRR6::HIS3 pbrr6-1 (LEU2/CEN)</i>                                                         | This study                        |
|                     |                                                                                                                                   |                                   |
| <b>Plasmid name</b> | <b>Description</b>                                                                                                                | <b>Source</b>                     |
| pAPQ12              | YEplac195 (2μm, URA3) with APQ12                                                                                                  | This study                        |
| pBRR6               | YEplac195 (2μm, URA3) with BRR6                                                                                                   | This study                        |
| pbrr6-1             | YCplac111 (LEU2/CEN) brr6-1                                                                                                       | This study                        |
| pERG6-RFP           | pGREG506 (URA3/CEN) with ERG6-RFP                                                                                                 | This study                        |
| pHDEL-RFP           | pGREG506 (URA3/CEN) with HDEL-RFP                                                                                                 | This study                        |
