# Supplementary material
Source: PubMed Central journal article supplement (PMC2880010)
Supplement: supp_123_7_1015__2.pdf [file supp_123_7_1015__2.pdf]

**Table S1. Yeast strains used in this study**

| Strain                           | Relevant genotypes                                                                                         | References          |
|----------------------------------|------------------------------------------------------------------------------------------------------------|---------------------|
| GA-1461                          | <i>lac<sup>OP</sup></i> and <i>lexA<sup>OP</sup></i> at <i>ARS607</i> , <i>lacI-GFP</i> , <i>NUP49-GFP</i> | Taddei et al., 2004 |
| GA-1461/pAT4                     | GA-1461 with plasmid pAT4                                                                                  | Taddei et al., 2004 |
| GA-1461/pAT4-Sir4 <sup>PAD</sup> | GA-1461 with plasmid pAT4-Sir4 <sup>PAD</sup>                                                              | Taddei et al., 2004 |
| GA-1461/pAT4-Yku80-9             | GA-1461 with plasmid pAT4-Yku80-9                                                                          | Taddei et al., 2004 |
| GA-1461/pAT4-Yif1 (=HE87)        | GA-1461 with plasmid pAT4-Yif1                                                                             | Taddei et al., 2004 |
| SHY256*                          | BY4741 <i>NUP49-mCherry::Sp his5<sup>+</sup></i>                                                           | This study          |
| HE112 <sup>†</sup>               | GA-1461 <i>NUP49-mCherry::nat1<sup>+</sup></i>                                                             | This study          |
| HE114                            | HE112 with plasmid pAT4                                                                                    | This study          |
| HE115                            | HE112 with plasmid pAT4-Sir4 <sup>PAD</sup>                                                                | This study          |
| HE116                            | HE112 with plasmid pAT4-Yku80-9                                                                            | This study          |
| SHY364                           | HE112 <i>ppr1Δ</i> with <i>URA3</i> inserted between LexA binding sequences and <i>ARS607</i> <sup>‡</sup> | This study          |
| SHY366                           | HE112 <i>ppr1Δ</i> with <i>URA3</i> inserted between LexA binding sequences and <i>ARS607</i> <sup>‡</sup> | This study          |
| SHY376                           | SHY364 with plasmid pAT4                                                                                   | This study          |
| SHY377                           | SHY364 with plasmid pAT4-Sir2                                                                              | This study          |
| SHY378                           | SHY364 with plasmid pAT4-Sir4 <sup>PAD</sup>                                                               | This study          |
| SHY379                           | SHY364 with plasmid pAT4-Yku80-9                                                                           | This study          |
| SHY380                           | SHY364 with plasmid pAT4-Yif1                                                                              | This study          |
| SHY381                           | SHY366 with plasmid pAT4                                                                                   | This study          |
| SHY382                           | SHY366 with plasmid pAT4-Sir2                                                                              | This study          |
| SHY383                           | SHY366 with plasmid pAT4-Sir4 <sup>PAD</sup>                                                               | This study          |
| SHY384                           | SHY366 with plasmid pAT4-Yku80-9                                                                           | This study          |
| SHY385                           | SHY366 with plasmid pAT4-Yif1                                                                              | This study          |

\*To construct SHY256, *NUP49* of the strain BY4741 was C-terminally tagged with *mCherry* by means of one-step gene replacement with a PCR fragment amplified from plasmid pKT355 (Iwase et al, 2006).

†The *Sp his5<sup>+</sup>* marker in SHY256 was first replaced with *nat1* by targeted replacement. Strain HE112 was then derived from GA-1461 (Taddei et al, 2004) by replacing *NUP49-GFP* with a *NUP49-mCherry-nat1* PCR fragment amplified from this strain.

‡SHY364 and SHY366 have *URA3* inserted between LexA binding sites and *ARS607*.

SHY364 has the *URA3* promoter oriented proximal to the LexA binding sequences, whereas SHY366 has the *URA3* promoter oriented distal to the LexA binding sequences.
