# Supplementary material
Source: PubMed Central journal article supplement (PMC2880010)

*Consensus*

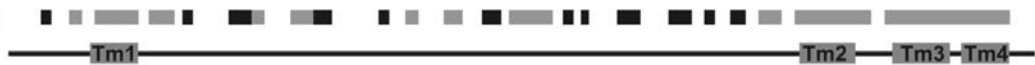

GOR1

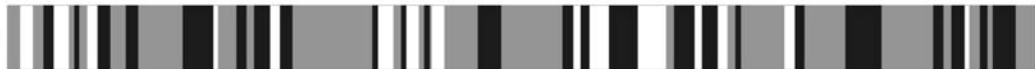

NNPREDICT

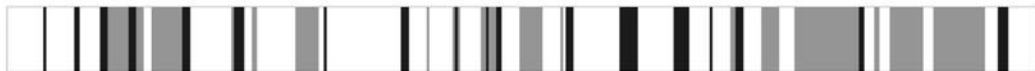

HNN

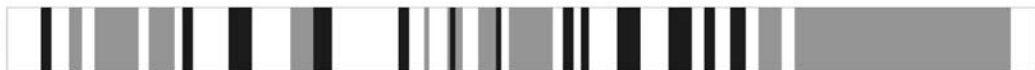

SOPM

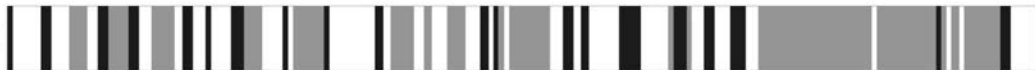

SOPMA

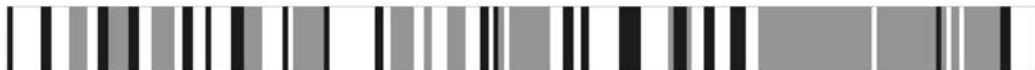

Supplement: supp_121_4_536__3.pdf [file supp_121_4_536__3.pdf]

Overview

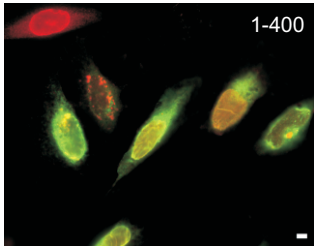

LUMA x Emerin

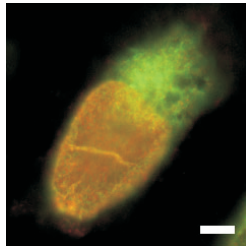

LUMA

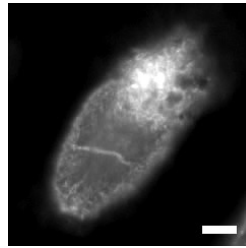

Emerin

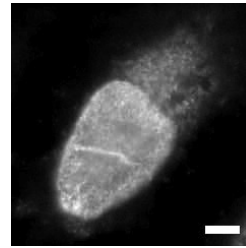

DAPI

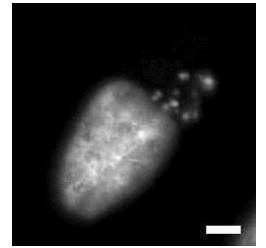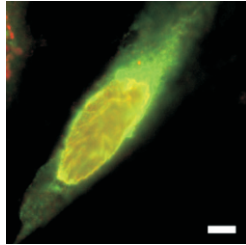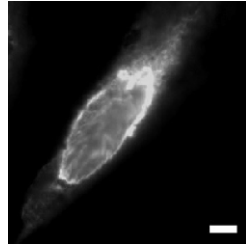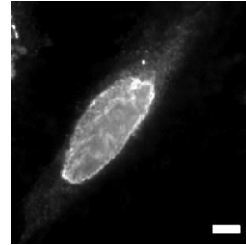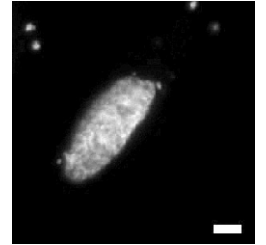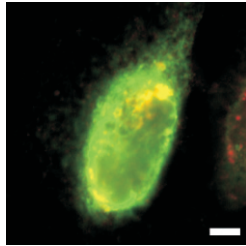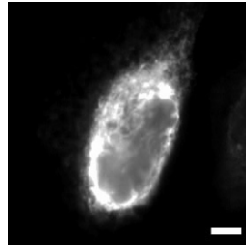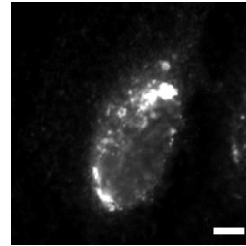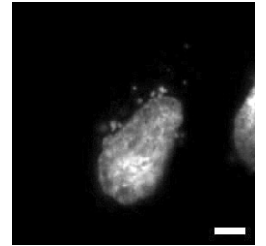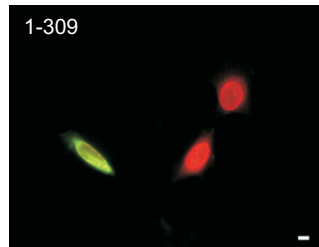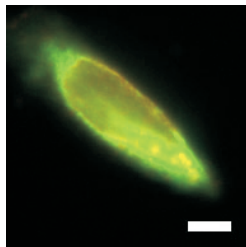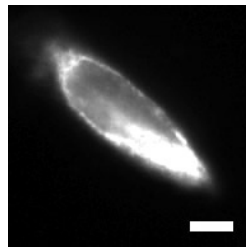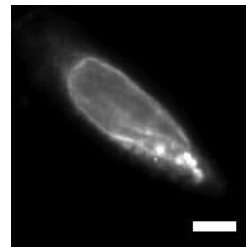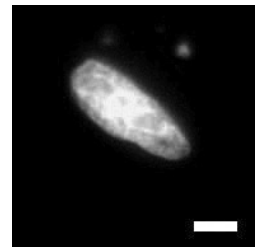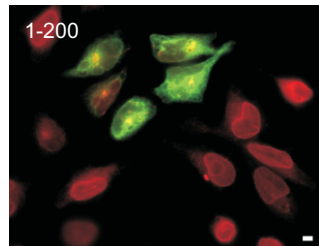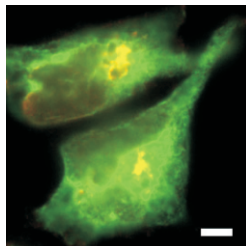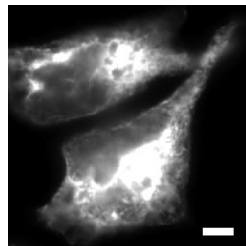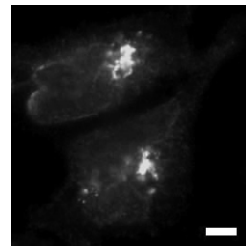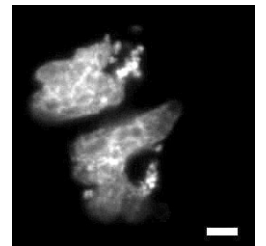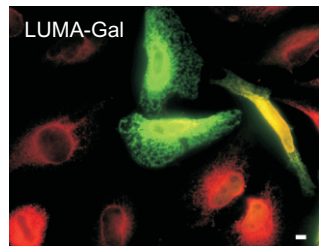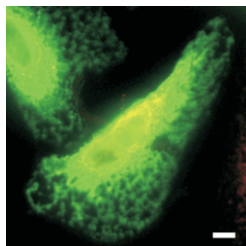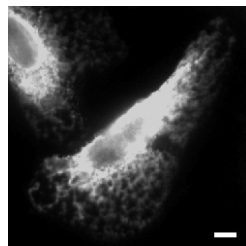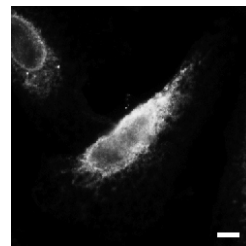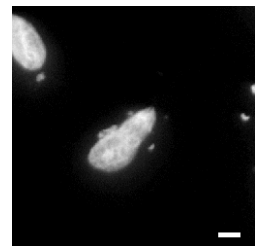

Supplement: supp_121_4_536__4.pdf [file supp_121_4_536__4.pdf]

**A**m.w.  
(kDa)

67 —

49 —

36 —

29 —

24 —

20 —

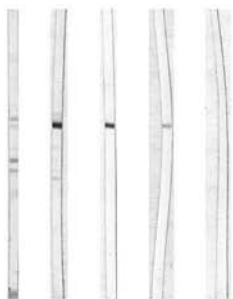

LUMA

- 1 Serum
- 2 Pur. Ab. 1:1.000
- 3 Pur. Ab. 1:2.000
- 4 Pur. Ab. 1:10.000
- 5 Control

1 2 3 4 5

**B**

LUMA

DAPI

Control

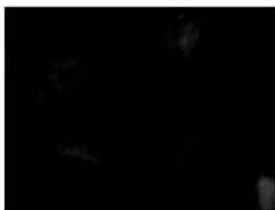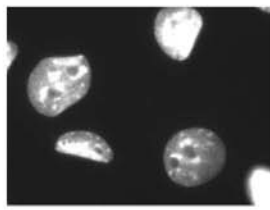

1:1000

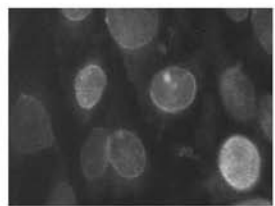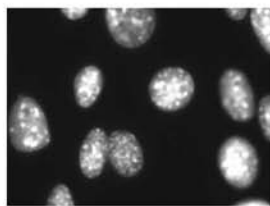

1:500

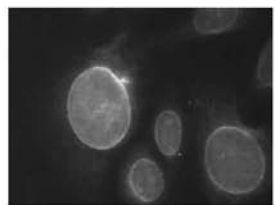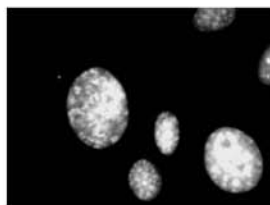

1:100

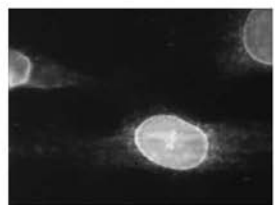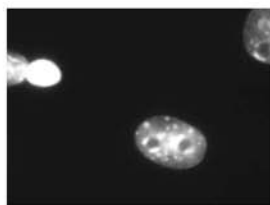

Supplement: supp_121_4_536__5.pdf [file supp_121_4_536__5.pdf]

Control RNAi

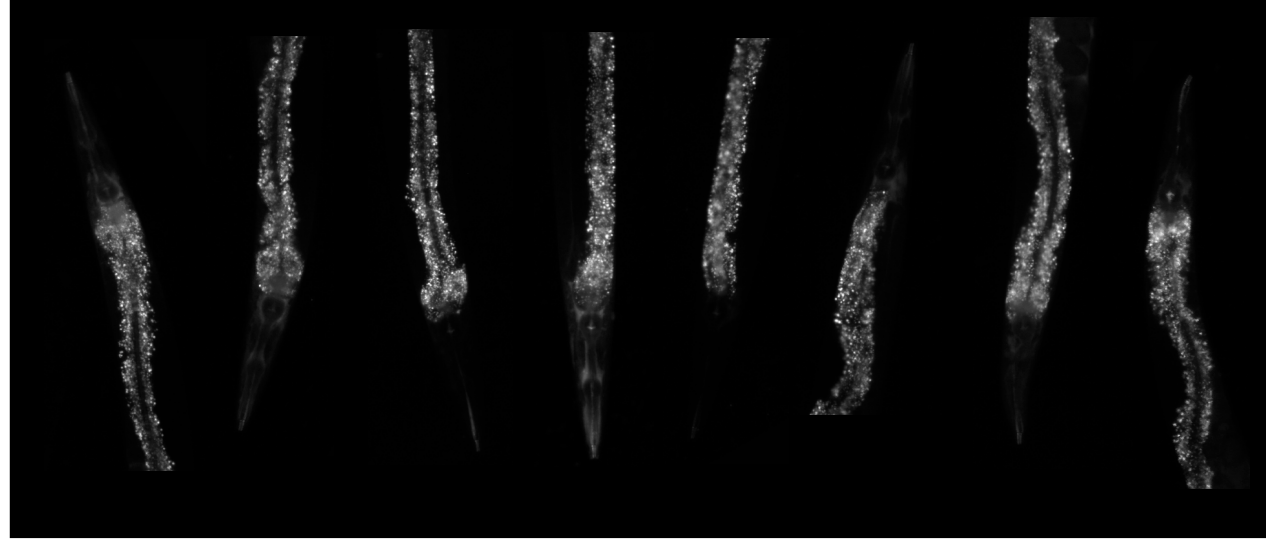

*lpin-1* (RNAi)

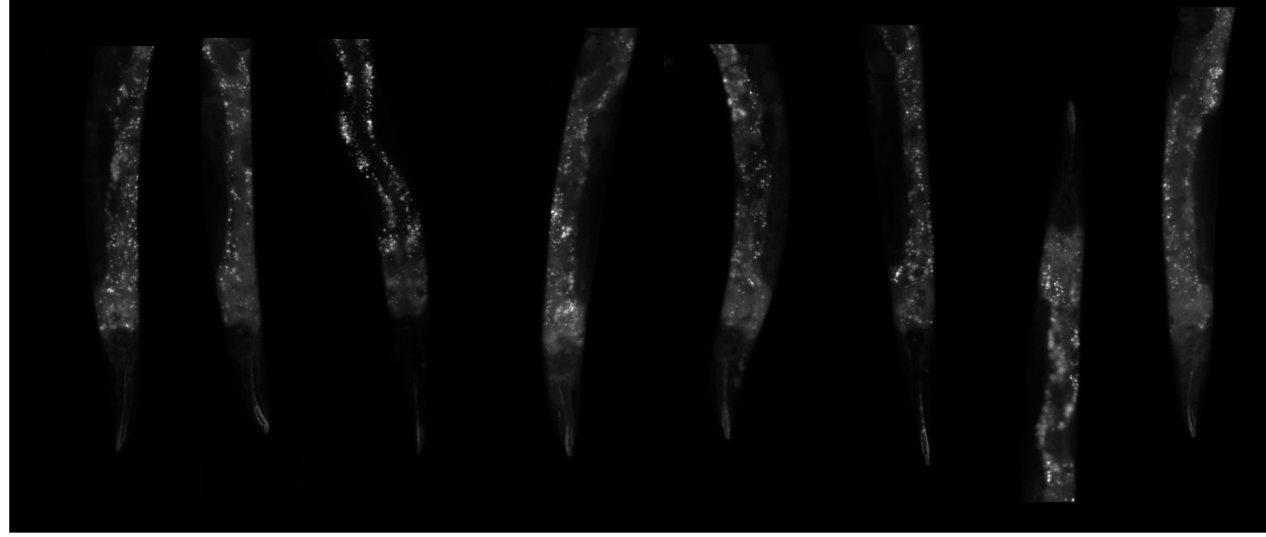

*sbp-1* (RNAi)

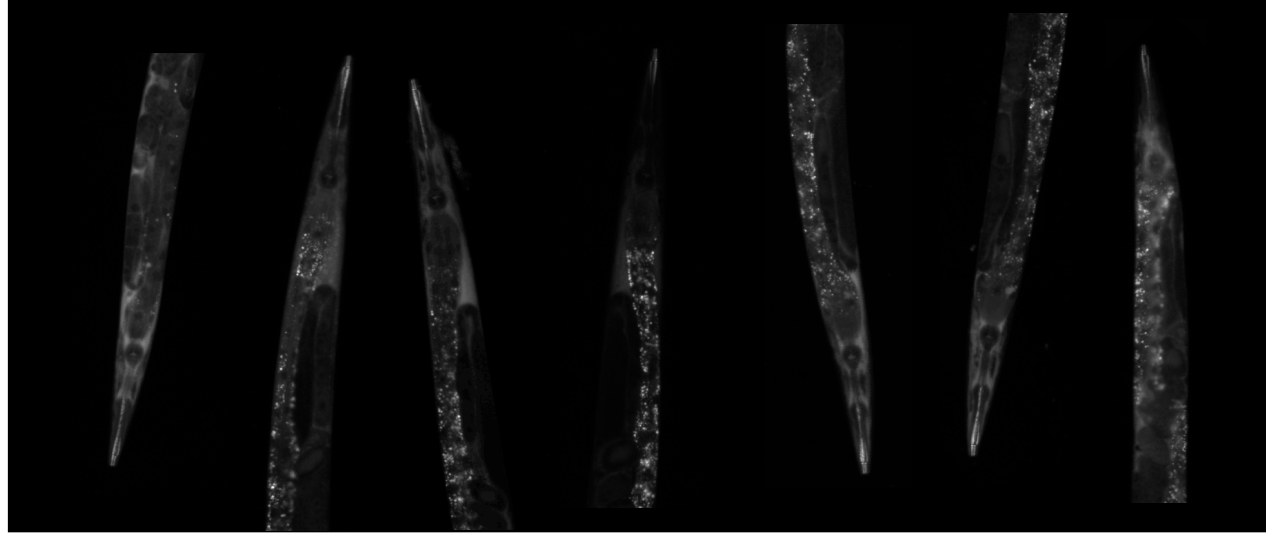

Supplement: supp_122_12_1970__1.pdf [file supp_122_12_1970__1.pdf]

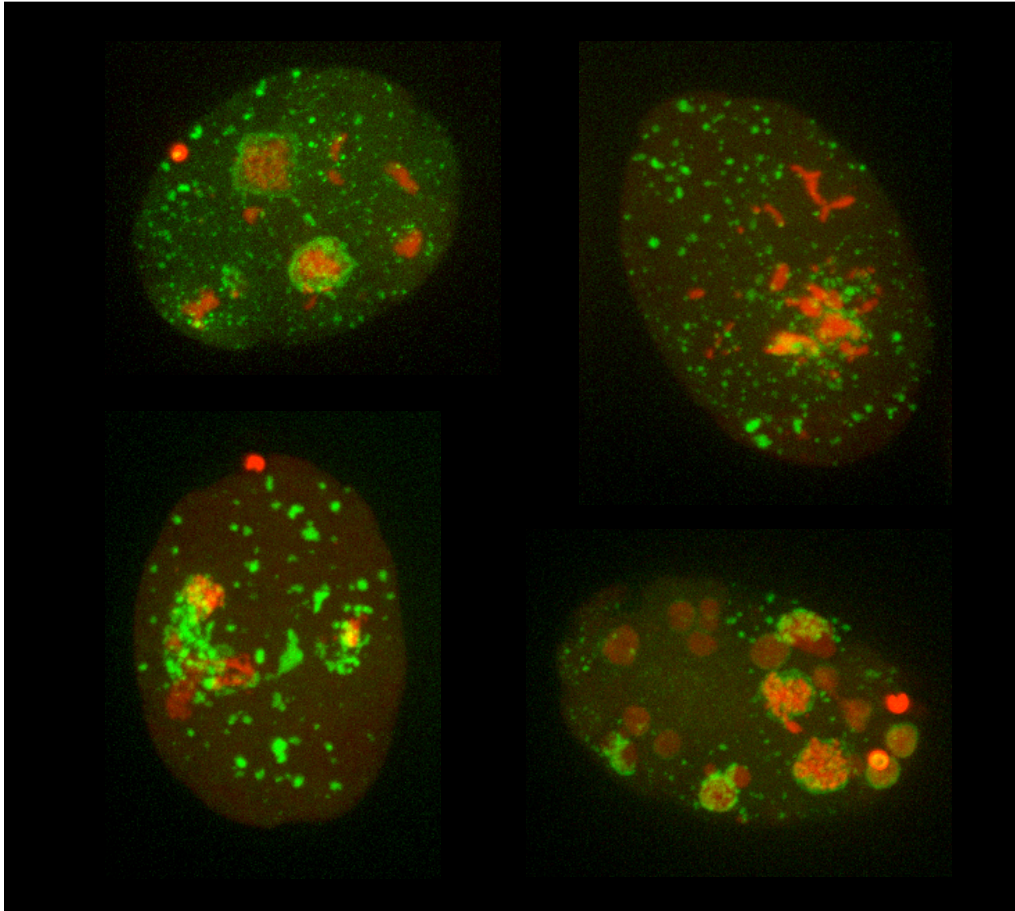

NPP-1::GFP H2B::CR

Supplement: supp_122_12_1970__2.pdf [file supp_122_12_1970__2.pdf]

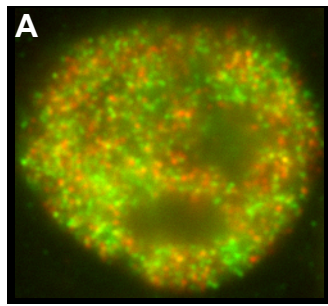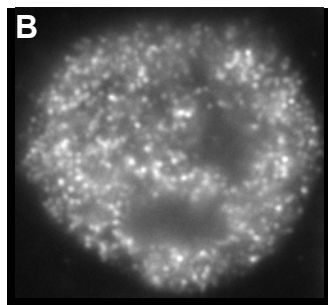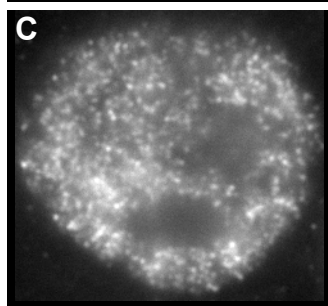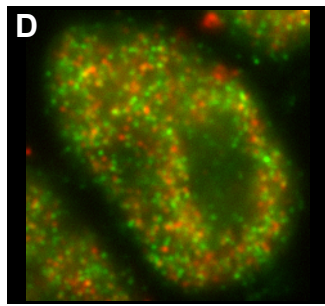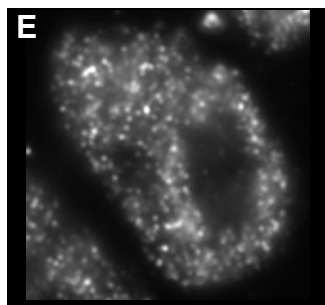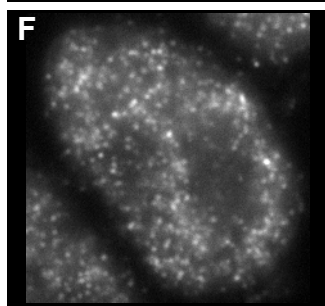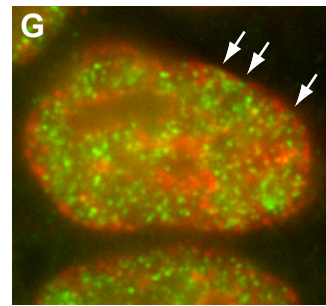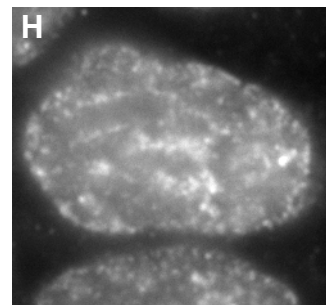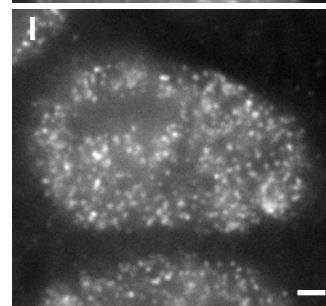

Supplement: supp_122_20_3729__2.pdf [file supp_122_20_3729__2.pdf]

Figure S1

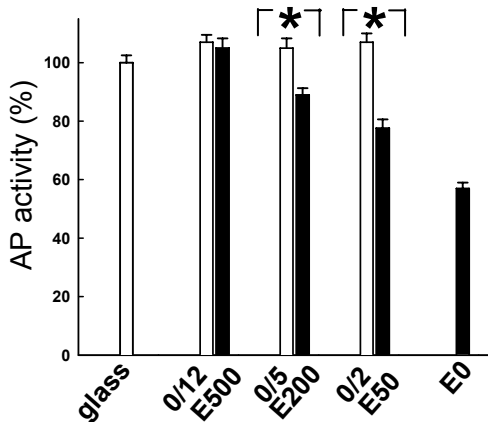

Supplement: supp_123_1_29__1.pdf [file supp_123_1_29__1.pdf]

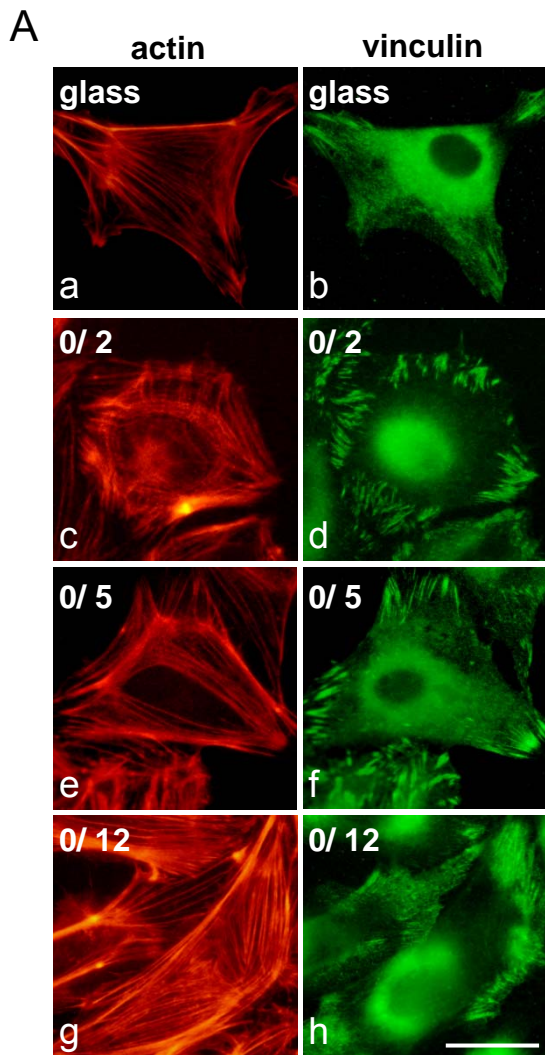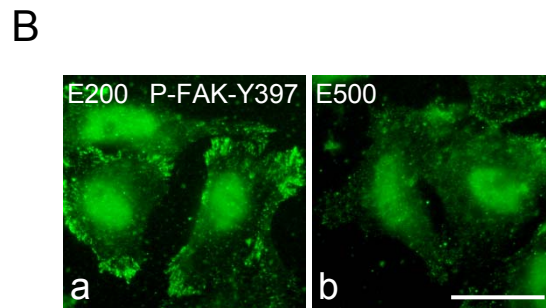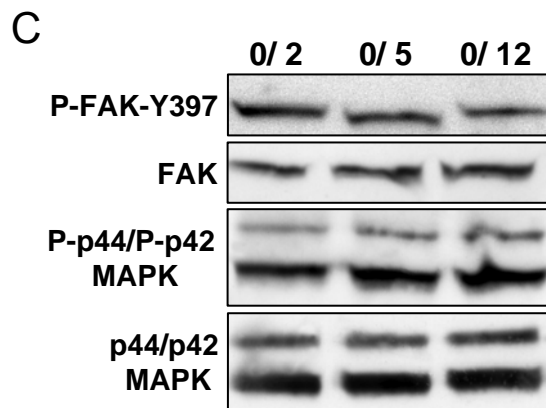

Supplement: supp_123_1_29__2.pdf [file supp_123_1_29__2.pdf]

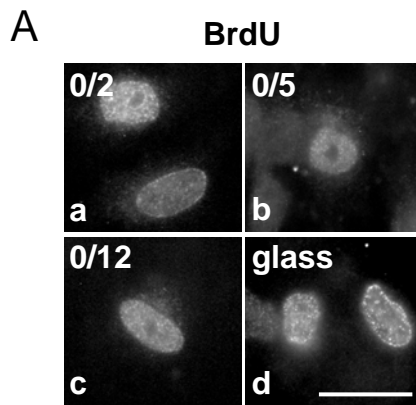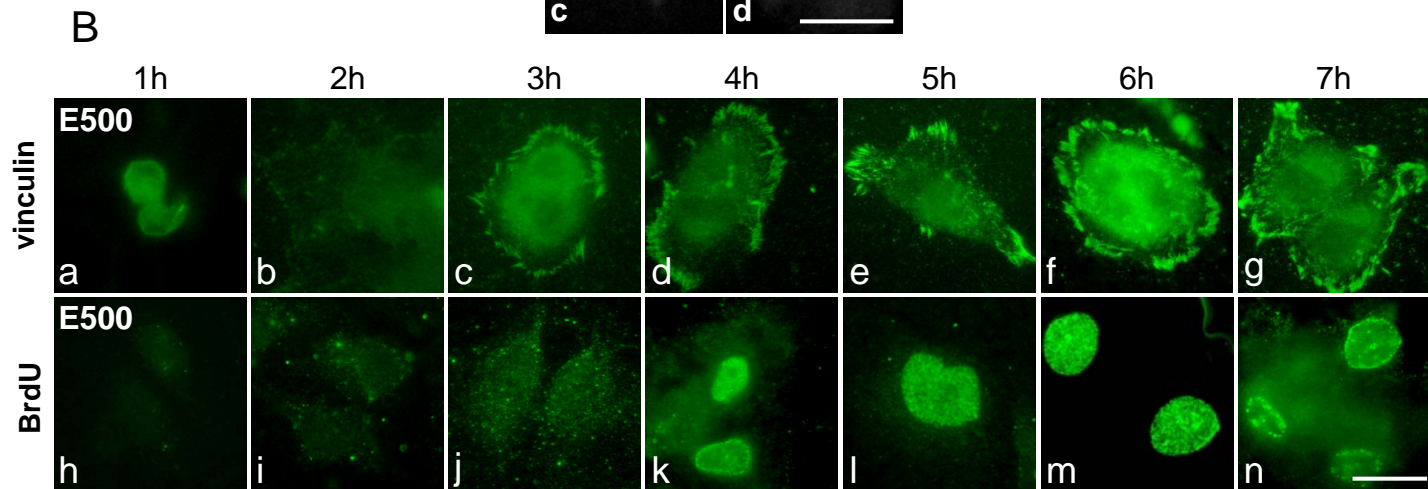

Supplement: supp_123_1_29__3.pdf [file supp_123_1_29__3.pdf]

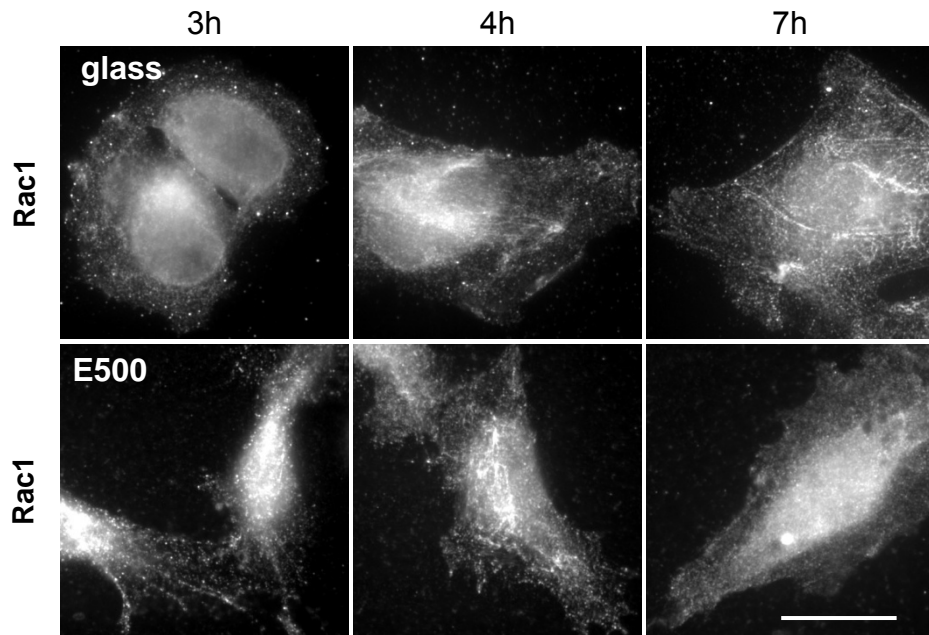

Supplement: supp_123_1_29__4.pdf [file supp_123_1_29__4.pdf]

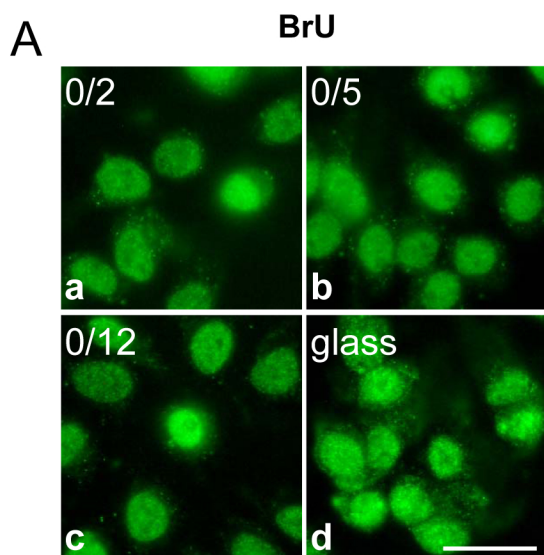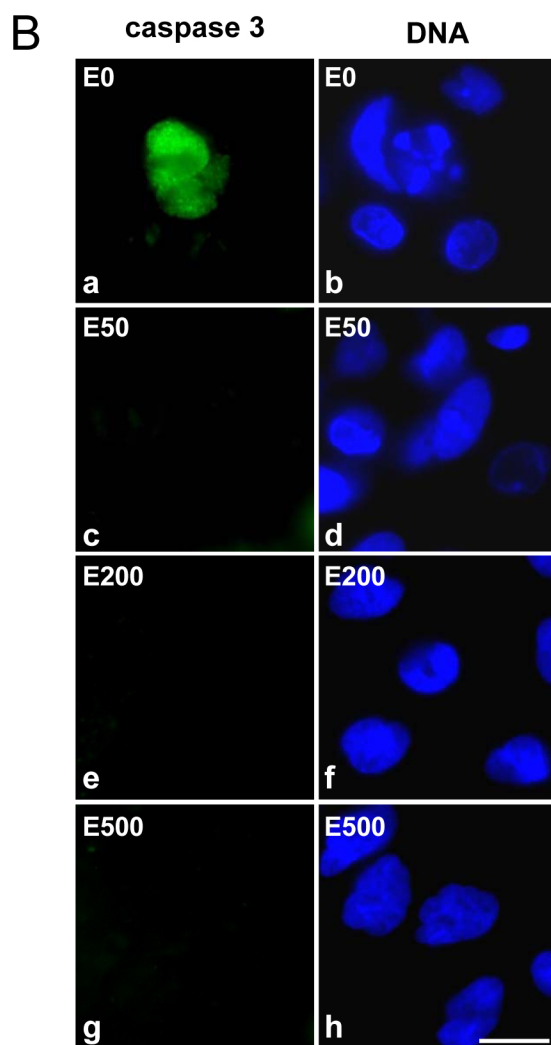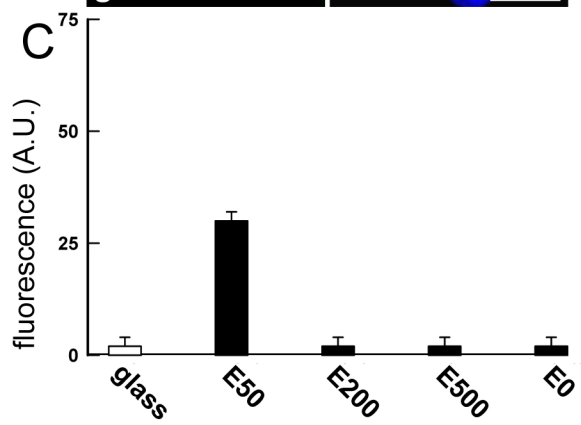

Supplement: supp_123_1_29__5.pdf [file supp_123_1_29__5.pdf]
